# Supplementary material
Source: HighWire-hosted journal article supplement (https://bibliotheek.ehb.be/content/34/11/749)

# Monash Medical Centre ED Renal Colic Imaging Flowchart

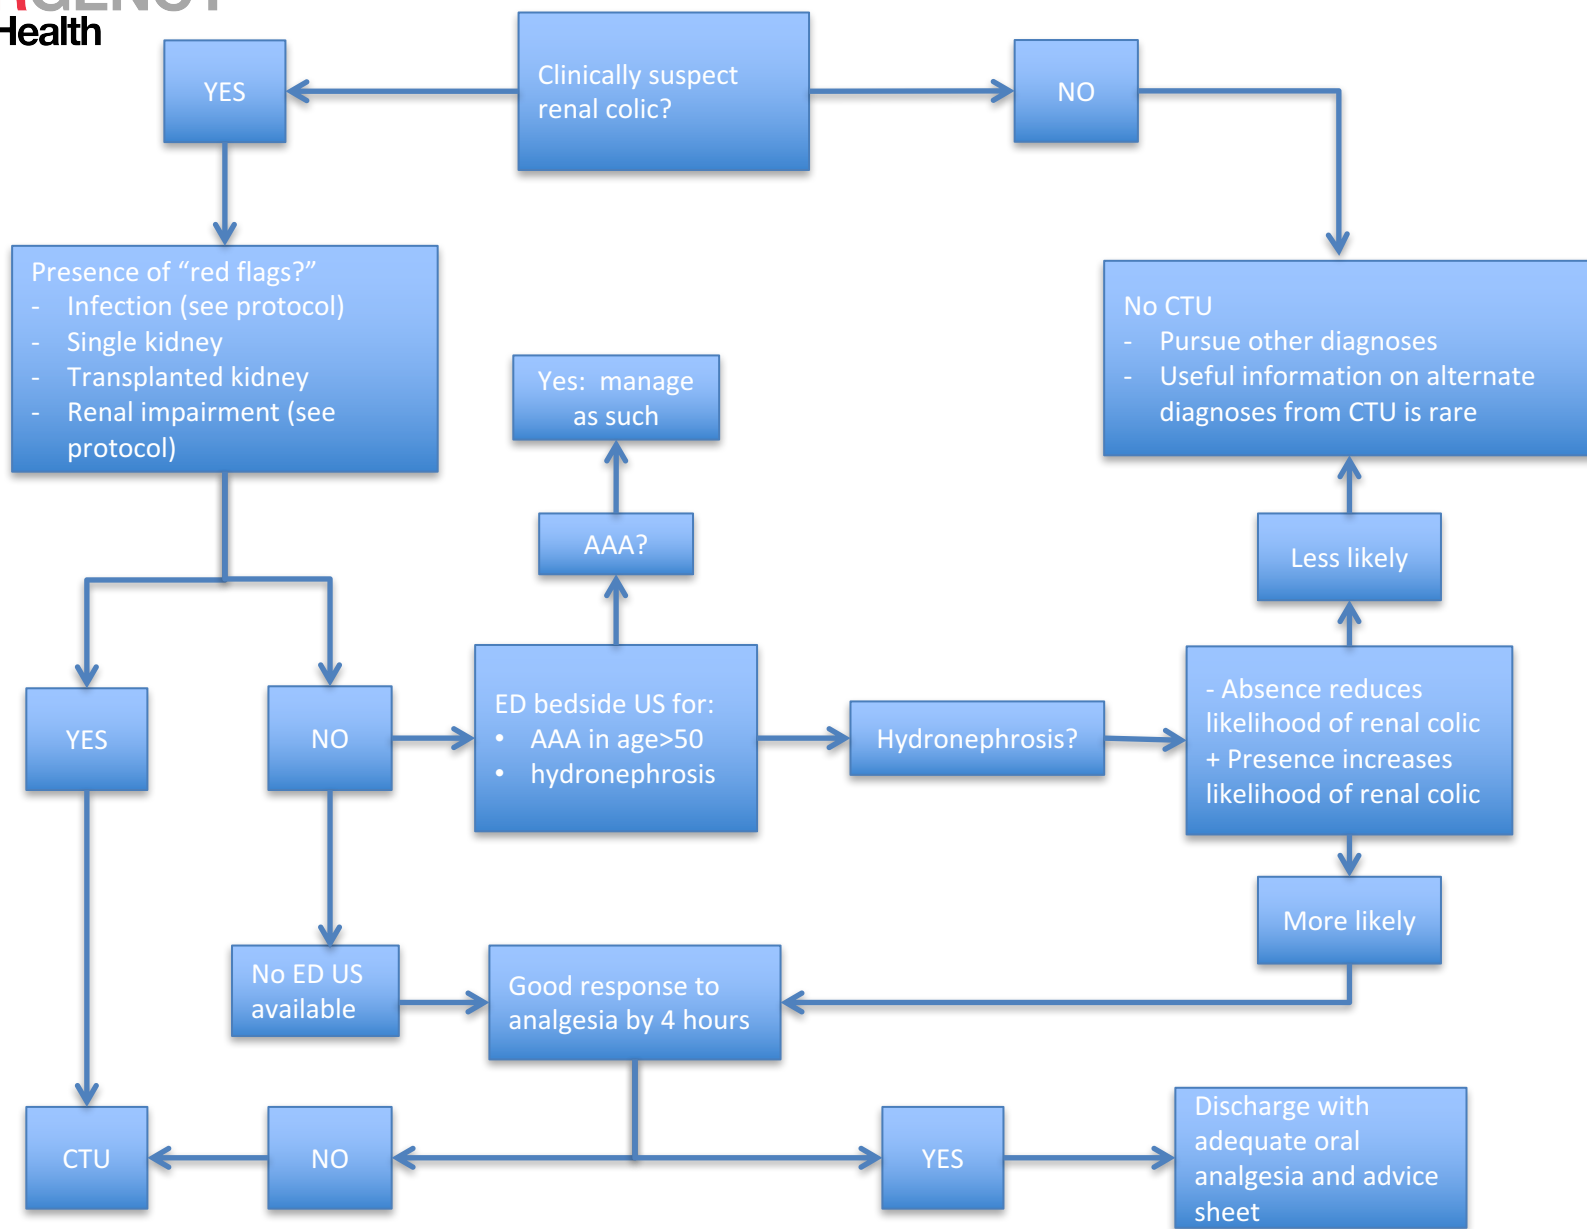

Supplement: inline-supplementary-material-1 [file inline-supplementary-material-1.pdf]
